# Supplementary material for: Moving to a Highly Walkable Neighborhood and Incidence of Hypertension: A Propensity-Score Matched Cohort Study
Source: PubMed Central journal article supplement (PMC4892930; doi:10.1289/ehp.1510425), 2015-11-08
Supplement: ehp.1510425.s001.acco.pdf [file ehp.1510425.s001.acco.pdf]

**Note to readers with disabilities:** *EHP* strives to ensure that all journal content is accessible to all readers. However, some figures and Supplemental Material published in *EHP* articles may not conform to [508 standards](#) due to the complexity of the information being presented. If you need assistance accessing journal content, please contact [ehp508@niehs.nih.gov](mailto:ehp508@niehs.nih.gov). Our staff will work with you to assess and meet your accessibility needs within 3 working days.

## **Supplemental Material**

### **Moving to a Highly Walkable Neighborhood and Incidence of Hypertension: A Propensity-Score Matched Cohort Study**

Maria Chiu, Mohammad-Reza Rezai, Laura C. Maclagan, Peter C. Austin, Baiju R. Shah, Donald A. Redelmeier, and Jack V. Tu

#### **Table of Contents**

**Table S1.** Baseline characteristics of Ontario residents who moved from low to high walkability areas vs. low to low walkability areas, before Propensity-Score Matching.

**Table S2.** Cox-Proportional hazard ratios (HR) for the risk of incident hypertension in the unmatched sample of movers.

**Figure S1.** Event-free Adjusted Survival Curves for the Unmatched Sample of Participants who Moved from Low to High or Low to Low Walkability Areas. Low and high walkability areas were defined as Walk Score of  $<90$  and  $\geq 90$ , respectively. Survival curves were produced using the corrected group prognosis method (Makuch 1982). The model was adjusted for age, sex, income, education, marital status, immigrant status, urban/rural dwelling, race/ethnicity, current smoking, prevalent diabetes, inadequate leisure physical activity, inadequate fruit and vegetable consumption ( $<3$  times per day), body-mass index, alcohol consumption, psychosocial stress, and index year. \* Hazard ratios and p-values were produced using a weighted Cox proportional hazards model adjusted for the same covariates.

**Table S1. Baseline characteristics of Ontario residents who moved from low to high walkability areas vs. low to low walkability areas, before Propensity-Score Matching.\***

| <b>Sociodemographic Characteristics</b>        | <b>Low to low walkability (n=32626)</b> | <b>Low to high walkability (n=1111)</b> | <b>P Value</b> |
|------------------------------------------------|-----------------------------------------|-----------------------------------------|----------------|
| Age at index date, years                       |                                         |                                         |                |
| Mean (Median)                                  | 39.9 (38)                               | 37.0 (34)                               | <0.001         |
| Age at index date (grouped), years             |                                         |                                         |                |
| 20 to 34                                       | 41.2                                    | 54.4                                    | <0.001         |
| 35 to 45                                       | 29.3                                    | 21.9                                    | <0.001         |
| 46+                                            | 29.4                                    | 23.8                                    | 0.004          |
| No. of years between interview and index dates |                                         |                                         |                |
| Mean (Median)                                  | 3.0 (2)                                 | 3.1 (2)                                 | 0.23           |
| Male sex, %                                    | 48.3                                    | 51.7                                    | 0.14           |
| Area-based income quintile at index date       |                                         |                                         |                |
| 1 (lowest)                                     | 19.5                                    | 27.3                                    | <0.001         |
| 2                                              | 19.6                                    | 23.7                                    | 0.06           |
| 3                                              | 20.4                                    | 14.6                                    | <0.001         |
| 4                                              | 22.1                                    | 13.9                                    | <0.001         |
| 5 (highest)                                    | 18.4                                    | 20.5                                    | 0.28           |
| Individual-level income, \$                    |                                         |                                         |                |
| Mean (Median)                                  | 37,095 (30,000)                         | 36,562 (28,000)                         | 0.79           |
| Less than secondary school education           | 11.3                                    | 5.5                                     | <0.001         |
| Married or common-law                          | 59.7                                    | 33.0                                    | <0.001         |
| Urban dwelling at index date                   | 90.4                                    | 93.6                                    | 0.001          |
| Immigrant                                      | 30.5                                    | 34.8                                    | 0.08           |
| Number of years in Canada (among immigrants)   |                                         |                                         |                |
| Mean, (Median)                                 | 16.3 (13)                               | 15.6 (13)                               | 0.46           |
| Race/Ethnicity                                 |                                         |                                         |                |
| White                                          | 75.2                                    | 72.3                                    | 0.20           |
| South Asian                                    | 6.4                                     | 3.2                                     | <0.001         |
| Chinese                                        | 3.6                                     | 3.6                                     | 0.99           |
| Black                                          | 3.2                                     | 5.4                                     | 0.07           |
| Other                                          | 11.6                                    | 15.6                                    | 0.05           |
| Current smoker                                 | 29.6                                    | 28.7                                    | 0.68           |
| Prevalent diabetes                             | 1.9                                     | 0.6                                     | <0.001         |
| BMI (kg/m <sup>2</sup> )                       |                                         |                                         |                |
| Mean (Median)                                  | 25.1 (24)                               | 24.0 (24)                               | <0.001         |
| Overweight (BMI ≥ 25 kg/m <sup>2</sup> )       | 43.6                                    | 33.0                                    | <0.001         |
| Obese (BMI ≥ 30 kg/m <sup>2</sup> )            | 12.2                                    | 7.2                                     | <0.001         |

|                                                     |         |         |        |
|-----------------------------------------------------|---------|---------|--------|
| Psychosocial stress                                 | 26.2    | 29.6    | 0.11   |
| Leisure physical activity                           |         |         |        |
| Active                                              | 24.7    | 29.4    | 0.04   |
| Moderate                                            | 24.2    | 24.1    | 0.97   |
| Inactive                                            | 51.1    | 46.5    | 0.10   |
| Leisure physical activity (<15 mins/day)            | 65.1    | 61.8    | 0.14   |
| Alcohol consumption                                 |         |         |        |
| Regular drinker                                     | 64.2    | 72.9    | <0.001 |
| Occasional drinker                                  | 17.4    | 11.5    | <0.001 |
| Non-drinker                                         | 18.4    | 15.6    | 0.11   |
| Inadequate fruits and vegetables (<3 times per day) | 26.2    | 25.3    | 0.65   |
| No. of times consumed fruits and vegetables per day |         |         |        |
| Mean (Median)                                       | 4.7 (4) | 5.0 (5) | 0.03   |
| Fair/poor self-rated overall health                 | 7.3     | 7.1     | 0.88   |
| Fair/poor self-rated mental health                  | 5.1     | 4.8     | 0.71   |

\*Low and high walkability areas were defined as Walk Score of <90 and  $\geq 90$ , respectively (Walk Score Methodology [www.walkscore.com](http://www.walkscore.com)). Data were derived from the Ontario components of the Canadian Community Health Survey (2001-2010) linked to the Ontario Hypertension Database. Estimates are percentages unless otherwise specified. All estimates were weighted by the survey sample weight and bootstrap p-values were obtained. Definitions: leisure physical activity average daily energy expenditure (active:  $\geq 3.0$  kcal/kg/day, moderately active: 1.5-2.9 kcal/kg/day; inactive: <1.5 kcal/kg/day), alcohol consumption (regular drinker: at least once per month; occasional drinker: less than once per month; non-drinker: never in the past year from survey date).

**Table S2. Cox-Proportional hazard ratios (HR) for the risk of incident hypertension in the unmatched sample of movers.\***

| Model                                                           | N     |                        |                         | HR   | 95% Confidence Interval | P value |
|-----------------------------------------------------------------|-------|------------------------|-------------------------|------|-------------------------|---------|
|                                                                 | Total | Low to low walkability | Low to high walkability |      |                         |         |
| Unadjusted                                                      | 33737 | 32626                  | 1111                    | 0.51 | (0.34, 0.74)            | 0.001   |
| Adjusted for age and sex                                        | 33737 | 32626                  | 1111                    | 0.55 | (0.37, 0.80)            | 0.004   |
| + income, education                                             | 33433 | 32327                  | 1106                    | 0.56 | (0.37, 0.81)            | 0.004   |
| +immigrant status, race/ethnicity, urban, married or common-law | 33376 | 32270                  | 1106                    | 0.56 | (0.37, 0.81)            | 0.006   |
| + leisure physical activity, BMI, smoking, diabetes, index year | 31122 | 30561                  | 1061                    | 0.59 | (0.36, 0.86)            | 0.02    |
| +fruit/vegetable consumption, stress, alcohol consumption       | 31505 | 30448                  | 1057                    | 0.57 | (0.35, 0.85)            | 0.01    |

\*Low and high walkability areas were defined as Walk Score of <90 and  $\geq 90$ , respectively. Data were derived from the Ontario components of Statistics Canada's Canadian Community Health Survey (2001-2010) linked to the Ontario Hypertension Database to ascertain incident hypertension. All estimates were weighted by the survey sample weight and bootstrap methods were used for variance estimation. Study covariates in the fully adjusted model included: age at index date, sex, area-based income quintiles from census data at index date, less than high school education, immigrant status, ethnicity (White, South Asian, Chinese, Black, other), urban or rural dwelling at index date, marital status, current smoking, body-mass index, prevalent diabetes, inadequate leisure physical activity, index year (ranging from 2001 to 2010), inadequate fruit and vegetable consumption (i.e. eating fruits or vegetables less than 3 times a day), psychosocial stress (i.e. feeling “extremely” or “quite a bit” vs. “not at all”, “not very” or “a bit” stressed in most days), and alcohol consumption (regular drinker, occasional drinker, never drank in past 12 months).

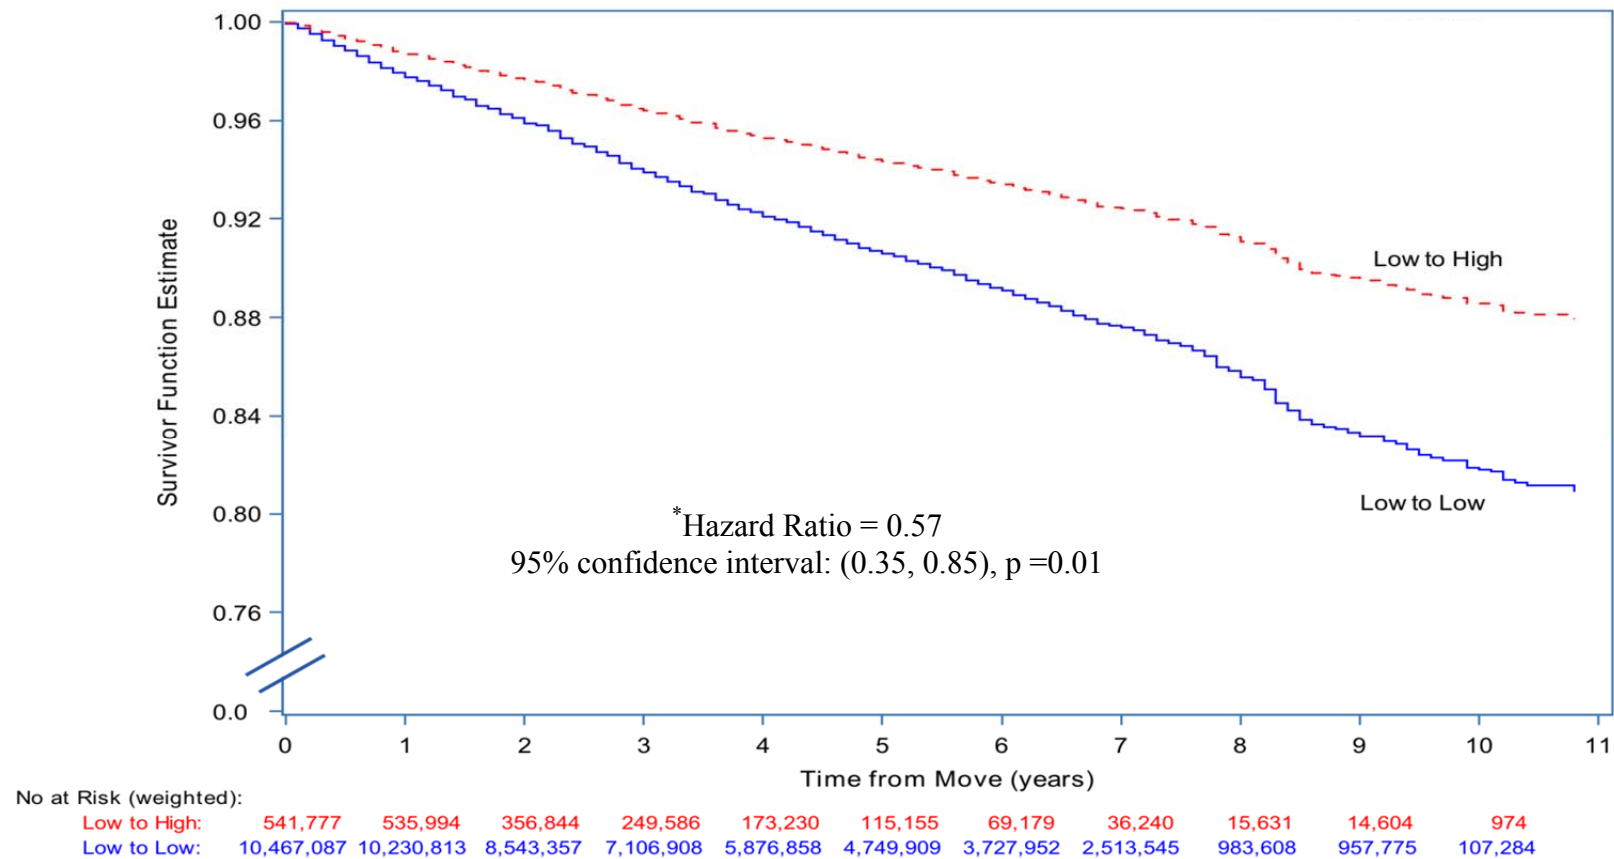

**Figure S1. Event-free Adjusted Survival Curves for the Unmatched Sample of Participants who Moved from Low to High or Low to Low Walkability Areas.**

Low and high walkability areas were defined as Walk Score of <90 and  $\geq 90$ , respectively. Survival curves were produced using the corrected group prognosis method (Makuch 1982). The model was adjusted for age, sex, income, education, marital status, immigrant status, urban/rural dwelling, race/ethnicity, current smoking, prevalent diabetes, inadequate leisure physical activity, inadequate fruit and vegetable consumption (<3 times per day), body-mass index, alcohol consumption, psychosocial stress, and index year. \*Hazard ratios and p-values were produced using a weighted Cox proportional hazards model adjusted for the same covariates.

## References

Makuch RW. Adjusted survival curve estimation using covariates. 1982. J Chron Dis 35:437-443.

Walk Score Methodology. Available: <http://www.walkscore.com/methodology.shtml> [accessed 1 May 2015].
